**1Leveraging targeted sequencing for non-model species: a step-by-step guide to obtain a  
2reduced SNP set and a pipeline to automate data processing in the Antarctic Midge,  
3*Belgica antarctica*.**

4

**5Vitor A. C. Pavinato<sup>1,2</sup>, Saranga Wijeratne<sup>2</sup>, Drew Spacht<sup>3</sup>, David L. Denlinger<sup>3</sup>, Tea  
6Meulia<sup>2</sup>, Andrew P. Michel<sup>1,4</sup>**

7

8<sup>1</sup>Department of Entomology & <sup>4</sup>The Center for Applied Plant Sciences, 210 Thorne Hall, CFAES  
9Wooster Campus, The Ohio State University, 1680, Madison Avenue, Wooster, OH, USA.

10<sup>2</sup>Molecular and Cellular Imaging Center, Ohio Agricultural Research and Development Center,  
11Selby Hall, The Ohio State University, 1680, Madison Avenue, Wooster, OH, USA.

12<sup>3</sup>Department of Ecology, Evolution and Organismal Biology, The Ohio State University, 318, W.  
1312th Avenue, 300 Aronoff Laboratory, Columbus, OH

14

15Corresponding author:

16Vitor A. C. Pavinato

17Department of Entomology, Thorne Hall, CFAES Wooster Campus, The Ohio State University,  
181680, Madison Avenue, Wooster, OH, USA.

19[correapavinato.1@osu.edu](mailto:correapavinato.1@osu.edu)

20

21

22

23

24

25

26

27

28

29

30

31

32

33

34

35

36

37

38

39

40

41

42

## 43Abstract

44

45The sequencing of whole or partial (e.g. reduced representation) genomes are commonly  
46employed in molecular ecology and conservation genetics studies. However, due to sequencing  
47costs, a trade-off between the number of samples and genome coverage can hinder research  
48for non-model organisms. Furthermore, the processing of raw sequences requires familiarity  
49with coding and bioinformatic tools that are not always available. Here, we present a guide for  
50isolating a set of short, SNP-containing genomic regions for use with targeted amplicon  
51sequencing protocols. We also present a python pipeline--PypeAmplicon-- that facilitates  
52processing of reads to individual genotypes. We demonstrate the applicability of our method by  
53generating an informative set of amplicons for genotyping of the Antarctic midge, *Belgica*  
54*antarctica*, an endemic dipteran species of the Antarctic Peninsula. Our pipeline analyzed raw  
55sequences produced by a combination of high-multiplexed PCR and next-generation  
56sequencing. A total of 38 out of 47 (81%) amplicons designed by our panel were recovered,  
57allowing successful genotyping of 42 out of 55 (76%) targeted SNPs. The sequencing of ~150  
58bp around the targeted SNPs also uncovered 80 new SNPs, which complemented our analyses.  
59By comparing overall patterns of genetic diversity and population structure of amplicon data with  
60the low-coverage, whole-genome re-sequencing (lcWGR) data used to isolate the informative  
61amplicons, we were able to demonstrate that amplicon sequencing produces information and  
62results similar to that of lcWGR. Our methods will benefit other research programs where rapid  
63development of population genetic data is needed but yet prevented due to high expense and a  
64lack of bioinformatic experience.

65

66Key-words: conservation genetics, population genetics, reduced SNP assay, microfluidic PCR,  
67*Belgica antarctica*

68

69**Running title:** Targeted Amplicon-seq for non-model species.

70

71

72

73

74

75

76

77

78

79

80

81

82

83

84

## 85Introduction

86

87Sequencing whole (Prado-Martinez *et al.*, 2013) or partial (*e.g.* RADseq, Baird *et al.*, (2008))  
88genomes are now standards in molecular ecology and conservation genetic research (Ekblom &  
89Galindo, 2010; Fuentes-Pardo & Ruzzante, 2017; Supple & Shapiro, 2018). Although  
90sequencing costs per sample and per base-pair are decreasing, expenses to generate sufficient  
91genotypic data still impose serious constraints on the number of individuals or populations  
92sampled (Larson *et al.*, 2019). To estimate important features such as genetic diversity,  
93population structure and selection, genotypes from many individuals and populations provide  
94more robust results (Fumagalli, 2013). A sizable number of individuals must be genotyped  
95regardless of the constraints imposed by the sequencing technology and the available budget.  
96Adequate sampling is particularly important for conservation genetic studies that require the  
97correct delimitation of the targeted taxon for protection (Mace, 2004) and for genetic monitoring.  
98In addition, data generated with next-generation sequencing requires massive computational  
99storage and considerable training in bioinformatics and processing to make genotypic data  
100available for analysis. A lack of technological training restricts the choice of molecular marker  
101systems for laboratories researching conservation genetics (Fuentes-Pardo & Ruzzante, 2017;  
102Taylor, Dussex & van Heezik, 2017) and may require bioinformatic processing by another  
103laboratory or private company, adding to the expense.

104

105Most important information for population and conservation genetic studies can be achieved  
106with traditional molecular methods that do not require whole genome sequencing of populations  
107(Allendorf, 2017; Bowden *et al.*, 2012; Fischer *et al.*, 2017; Peterson *et al.*, 2012). Targeted  
108enrichment protocols are alternatives to whole-genome re-sequencing (WGR) (Henriques *et al.*,  
1092018; Meek & Larson, 2019; Milano *et al.*, 2013). These protocols enable amplification of  
110specific genomic regions that contain previously discovered variation. Combined with next-  
111generation sequencing and robust multiplex PCR amplification, they allow rapid sequencing of  
112hundreds of regions of the genome of several individuals (Campbell *et al.*, 2014; Yang *et al.*,  
1132016). Unlike exon capture protocols, which only sequence targeted expressed genes, amplicon  
114sequencing allows sequencing of known regions that likely contain more neutral variation  
115needed for population diversity studies. They also allow improved control and uniformity of  
116sequencing coverage and the acquisition of reliable, genotypic information with a limited  
117constraint on the number of sequenced individuals. These features make amplicon sequencing  
118a valuable tool for population and conservation genetics that require the genotyping of several  
119individuals from multiple populations to accurately estimate neutral genetic diversity, define  
120populations and infer important demography features (*e.g.* isolation-by-distance, effective  
121population size).

122

123As climate change and expansion of extreme environments continue to encroach on ecological  
124communities, researchers will need more rapid and cost-effective methods to assess changes in  
125population and species diversity. Molecular ecology studies of species that already inhabit  
126extreme environments can serve as a model for adaptation and have shown the importance of

127genetic variation and structure for population persistence (Brown *et al.*, 2019). To completely  
128understand and predict a species' and/or populations' potential for extinction, it is necessary to  
129not only uncover the molecular basis of adaptation, but also to characterize past and current  
130responses to environmental change. This is possible by measuring the impact of selection and  
131adaptation relative to the overall genetic diversity and population size to gain an understanding  
132of past and recent demographic changes. In some cases, these studies may require data from  
133fragmented populations, or among species with wide but patchy distributions. Since cost often  
134prohibits whole genome sequencing in populations, targeted sequencing is a less expensive  
135alternative that combines the robustness of genotyping with the practicality of processing large  
136number of samples.

137

138The Antarctic midge, *Belgica antarctica* (Diptera: Chironomidae), is an endemic insect from the  
139Antarctic continent ranging from southern Marguerite Bay (ca. 68°S) northwards to the South  
140Shetland Islands (ca. 63°S) (Convey & Block, 1996). *Belgica antarctica* is an ancient lineage  
141that diverged from the closest Orthocladiinae taxon inhabiting Patagonia, ~68Myr ago  
142(Allegretti *et al.*, 2006). Populations of *B. antarctica* that we examined near the Palmer  
143Research Station area may have originated from relictual populations that survived continental  
144glaciation or possibly from immigrants arriving from more northerly refuges. The midge exhibits  
145a plethora of adaptations to survive the extreme Antarctic conditions. Loss of wings is a likely  
146adaptation for surviving on the windy off-shore islands (Kelley *et al.* 2014), and numerous  
147physiological adaptations are evident, including freeze tolerance, constitutive expression of  
148heat shock proteins (Rinehart *et al.*, 2006), and resistance to dehydration (Hayward *et al.*, 2007;  
149Teets *et al.*, 2012a). By evolving physiological and morphological adaptations to inhabit  
150Antarctica over several million years, this species is highly adapted to surviving under these  
151environmental conditions. However, these conditions are rapidly changing and threaten its  
152persistence.

153

154Here we present a method to obtain an informative and reduced set of SNP markers for  
155targeted enrichment sequencing, and a python pipeline, PypeAmplicon (Wijeratne & Pavinato,  
1562018), designed to facilitate processing of raw amplicon reads produced by a combination of  
157high-multiplexed PCR and short read sequencing. Starting with low coverage, whole-genome re-  
158sequencing data (IcWGR), we present the steps to isolate informative and robust markers, with  
159guidelines for marker filtering based on population genetic estimates. This method provided an  
160informative set of amplicons and SNPs for *B. antarctica*. We present some helpful guidance on  
161how to process the raw data produced by a multiplex-PCR based amplicon sequencing for rapid  
162and reliable genotyping. By comparing the summary statistics estimated with the IcWGR data  
163with that obtained with the new amplicons set, we show that the platforms produced similar  
164patterns of genetic diversity and population structure.

165

166

## 167Material and Methods

168

### 169Panel design for target sequencing enrichment

170

171**Biological material and DNA extraction.** For the whole-genome re-sequencing we sampled  
172individuals from two sites that were 7.8 km apart: Humble Island (HP) and Dream Island (D1), in  
173the Antarctic Peninsula (Figure S1). Genomic DNA from twelve adult individuals from each site  
174were extracted using the DNeasy® Blood & Tissue Kit (Qiagen). DNA was eluted in 50 µl of TE  
175buffer (10 mM Tris-HCl pH 8.0 and 1 mM de EDTA pH 8.0) and stored at -20°C. Prior to library  
176preparation, DNA samples were quantified using a Qbit® kit (Invitrogen). The instrument was  
177calibrated for the Quant-iT dsDNA BR Assay (assay range between 2–1000 ng; starting sample  
178concentration between 100 pg/µl and 1µg/µl), and samples were prepared according to the  
179manufacturer's instructions. DNA samples were diluted with ddH<sub>2</sub>O to reach our target  
180concentration of 50ng/µL.

181

182**De novo sequencing for marker discovery.** For each sample, we obtained a whole-genome  
183re-sequencing library using the TruSeq Library Prep Kit (Illumina). For each individual, one  
184unique barcode was added to the 5' end, allowing us to recover short reads from each sample  
185after parallel sequencing. Samples were pooled and sequenced with the HiSeq® 2500 System  
186(Illumina). Paired-end sequencing with 100 cycles for each side of the fragments was performed  
187in one lane.

188

189**Marker discovery, genetic diversity, population structure and outlier detection.** SNP  
190discovery and genotyping were carried out following a reference-based pipeline (Figure S2).  
191Trimmomatic (Bolger *et al.*, 2014) was used to remove low quality reads and nucleotides, any  
192remaining Illumina barcodes, and adapters. For each round of quality control, the quality of fastq  
193reads was checked with FASTQC (<http://www.bioinformatics.babraham.ac.uk/projects/fastqc/>).  
194Neither Miseq adapter nor kmer content were observed after trimming. Reads that passed  
195quality control were aligned to a reference genome (Kelley *et al.* (2014); found at NCBI  
196BioProject [#PRJNA172148](#)) using Bowtie2 (Langmead & Salzberg, 2012). SAMtools (Li *et al.*,  
1972009) was used to convert SAM to BAM files and to call SNPs. We applied a stringent filter with  
198vcftools version 0.1.16 (Danecek *et al.*, 2011) to keep only biallelic SNPs with a GQ quality  
199higher than 20, an average depth between 30 and 80 reads, and that were present in at least  
20080% of the individuals with minor allele frequency higher than 0.001.

201

202Global and within-population genetic variation were summarized by calculating the folded allele-  
203frequency spectrum (AFS) including the observed and expected heterozygosity. The folded AFS  
204was obtained with a custom R script using the matrix of SNPs produced by vcftools version  
2050.1.16, where 0 is the reference allele, 1 corresponds to the heterozygous genotypes and 2 is  
206the alternative allele. The proportion of heterozygous genotypes ( $H_O$  and  $H_E$ ) were calculated  
207with R package adegenet version 2.1.1 (Jombart, 2008). Fisher's exact tests for the H-W  
208proportion were carried out for all filtered SNPs in each population with 1000 Monte Carlo

209 permutations using the R package *pegas* version 0.11 (Paradis, 2010). P-values were corrected  
210 by Bonferroni's procedure. The population genetic structure was summarized with global  $F_{ST}$ ,  
211 estimated with the R package *hierfstat* version 0.04-22 (Goudet, 2005) along with a principal  
212 component analysis (PCA) carried out with *adegenet*.

213

214 We checked the neutrality of all whole-genome re-sequencing SNPs ("WGR SNPs") by running  
215 two genome scan analyses based on the distribution of  $F_{ST}$ : BAYESCAN v2.1 (Foll & Gaggiotti,  
216 2008) and OUTFLANK (Whitlock & Lotterhos, 2015). For BAYESCAN, the analysis included  
217 500,000 Markov-Chain Monte-Carlo (MCMC) after 500,000 iterations of a burn-in phase. We  
218 considered SNPs as outliers if they had posterior intro-locus  $F_{ST}$  estimates higher than the upper  
219 limit of the 95% highest posterior density (HPD) interval. For OUTFLANK, we used a set of  
220 independent SNPs to calibrate the  $F_{ST}$  null distribution and considered outlier SNPs with a q-  
221 value lower than 0.10, thus being less conservative with a false discovery rate (FDR) of 10%. A  
222 set of independent SNPs were identified by only taking SNPs with intra- and inter- scaffold  $R^2$   
223 statistics lower than 0.01.  $R^2$  statistics were calculated with *vcftools* (Danecek *et al.*, 2011). We  
224 only considered a SNP an outlier if it was identified in both analyses. We assessed if an outlier  
225 SNP was within or near a gene by visually mapping back to the genome and annotated gene  
226 list. We also determined if the variant alleles impacted predicted genes (i.e. nonsynonymous) by  
227 running a variant effect prediction analysis in Ensembl metazoa  
228 (<https://metazoa.ensembl.org/index.html>).

229

230 **Isolation of candidate markers and panel design.** To reduce the WGR SNPs to an  
231 informative and reduced set of SNPs, we performed a PCA with all discovered SNPs and  
232 ranked the first principal component loading score (Hulsege *et al.*, 2013; Wilkinson *et al.*,  
233 2011). PCA loadings were obtained with R package *adegenet* (Jombart, 2008). Since PCA  
234 loadings represent a correlation between the SNP and the respective principal components  
235 (PCs), ranking the first PC loadings reveals SNPs that contributed most to the individual  
236 assignment. Selected SNPs were only included in the panel if they met all the required  
237 characteristics: 1) passed the within population Fisher's exact test of Hardy-Weinberg  
238 equilibrium; 2) were not heterozygous in all sequenced individuals (as the heterozygote excess  
239 could be due to duplication or errors in SNP allele calling); and 3) were at least 5bp apart from  
240 another SNP in the scaffold, as clusters of SNPs could indicate accumulation of errors during  
241 sequencing and alignment of reads. By removing SNPs with only heterozygous states, in  
242 disequilibrium or in clusters, we improved the quality of SNP selection and minimized impact of  
243 low coverage sequencing on marker selection.

244

245 When possible, WGR SNPs detected as outliers were retained since their status can be  
246 validated with genotyping of additional populations and individuals. We manually inspected  
247 SNPs in annotated genes of the *B. antarctica* genome (Kelley *et al.*, 2014) that may also be  
248 adaptive and added those that were polymorphic. We also included randomly chosen neutral  
249 SNPs in the panel, since the choice based on ranked PCA can be biased towards SNPs that  
250 are divergent (neutrally or linked to a selected locus) between populations. A total of 47 primer

251pairs were designed to amplify 57 targeted SNP markers that included neutral and outlier SNPs,  
252and SNPs within genes (Figure S3). Each primer pair amplified a region ~150 bp long and was  
253manufactured by Fluidigm® according to the Access Array™ system. We ensured that each  
254primer uniquely paired with its corresponding amplicon sequence and if the amplicon aligned  
255uniquely to itself. We also checked if each amplified region aligned to a unique region in the  
256genome, by performing a homology search with BLAST (Altschul *et al.*, 1990).

257

### 258Validation of the panel for target sequencing enrichment

259

260**Samples.** To validate the isolated candidate SNPs, we genotyped, whenever possible, the  
261same individuals used in the whole-genome re-sequencing. Total genomic DNA was already  
262extracted (see above), but only 21 out of 24 adults (11 from D1 and 10 from HP population) had  
263enough DNA remaining to be quantified using NanoDrop® (ThermoFisher). DNA samples were  
264normalized (when necessary) to reach a target concentration of 15 ng/uL for analysis on the  
265Fluidigm Access Array (FAA).

266

267**Targeted resequencing.** Amplicon sequencing was carried out following the FAA system  
268protocol that automates preparation of amplicon-based libraries for up to 48 samples. Primers  
269were designed to amplify specific regions of the genome spanning 150 bp that contained the  
270isolated targeted SNPs. The multiplex PCR libraries were prepared following the Fluidigm®  
271library prep 48.48 IFC protocol, which consisted of two amplification steps: 1) a primary PCR  
272that amplified the amplicon of each targeted region, and 2) a secondary PCR on the pool of  
273amplicons from each sample to attach an individual-specific barcode. All samples were then  
274pooled and the NGS library was prepared following the NEBNext® Ultra™ DNA Library Prep  
275Kit for Illumina® (New EnglandBioLabs Inc.). Paired-end sequencing with 150 cycles for each  
276side of the fragments was performed in one lane of the MiSeq® System (Illumina).

277

278**SNP and genotyping calling for amplicon sequencing.** The raw paired-end reads of each  
279sample were first merged and clustered by similarities (> 75%) with usearch (Edgar, 2010).  
280Orphaned reads and clusters with fewer than 25 reads were discarded. Reads that passed the  
281clustering filter were then split into different files with BBsplit, according to their similarity to each  
282reference amplicon. This served a dual purpose: 1) to split the reads by amplicon, and 2) as a  
283quality control for reads within clusters. Filtered reads were then aligned to their amplicon using  
284BBmap. Both BBsplit and BBmap are part of BBtools (<https://sourceforge.net/projects/bbmap/>).  
285Each multi-sample BAM file of each amplicon was then merged.

286 We developed a pipeline to automate the processing of Fluidigm/MiSeq raw reads to call  
287individual genotypes. The pipeline PypeAmplicon is available at zenodo

288([doi:10.5281/zenodo.1490421](https://doi.org/10.5281/zenodo.1490421)). The pipeline was developed to process targeted-enrichment  
289amplicon-sequencing produced by double PCR protocols such as the FAA, but it can work with  
290raw data produced by any amplicon-sequencing protocol as long as the reference amplicon  
291sequences are provided (fasta format). The pipeline was designed as an alternative to the  
292alignment of filtered reads to a reference genome, since most non-model species may not have

293a sequenced genome. The outputs of the pipeline include BAM files so that any SNP caller can  
294be used such as GATK (McKenna *et al.*, 2010), SAMtools (Li *et al.*, 2009), or ANGSD  
295(Korneliussen *et al.*, 2014) (the latter is preferred if the goal is to obtain genotype-likelihoods  
296with limited sequencing output). In this study, we used FreeBayes (Garrison & Marth, 2012) to  
297perform the SNP calling on the multi -sample and -amplicons BAM file (Figure S4). To facilitate  
298comparison of the SNPs and genotypes produced by the whole-genome and amplicon  
299sequencing, the parameter that controls size of haplotype gaps (-E) was set to one. We only  
300kept SNP variation (local haplotypes were discarded) and produced two datasets for  
301downstream analyses and comparisons: 1) only targeted SNPs that were recovered and 2) all  
302SNPs, also called "*Amplicon-seq SNPs*".

303

304**Validation of targeted SNPs and comparison between WGR and amplicon-seq SNPs.** We  
305performed two types of comparisons to validate the targeted SNP approach. First, we compared  
306only the genotypes and the proportion of missing data from the targeted SNPs present in the  
307whole-genome sequencing and in the amplicon-sequencing data (i.e. same data but different  
308technologies). This step allowed us to evaluate correspondence between genotypes called with  
309both sequencing approaches. Assuming the amplicon-sequencing protocol provides better  
310confidence in genotyping calls since it allows sequencing of targeted regions with more depth,  
311we expected to have less missing calls for each individual and targeted SNP. We also expected  
312a reduction in the proportion of homozygous genotypes miscalled as heterozygous (false  
313positives) and in the proportion of heterozygous genotypes miscalled as homozygous (false  
314negatives). This comparison also allowed us to globally evaluate the isolation of informative  
315SNPs and validate genotypes identified by the outlier approaches.

316

317For the second comparison, we evaluated the ability of the amplicon-sequencing approach to  
318recover similar estimates of population genetic summary statistics and degrees of population  
319allele frequency differences through the quantification of overall  $F_{ST}$  and genetic structure. For  
320this comparison, we used two datasets: one containing all SNPs discovered with whole-genome  
321sequencing (WGR SNPs) and one containing all SNPs (originally targeted plus the *de novo*  
322SNPs) obtained with amplicon-sequencing. In addition to estimates obtained for the WGR SNPs  
323(see above), we also calculated summary statistics including: number of nucleotide differences  
324per nucleotide site ( $\pi$ ), Tajima's D (Tajima, 1989) and Watterson's estimator (Watterson, 1975) .  
325Estimates were performed for each focal SNP and a 150bp window around the SNP (to  
326reproduce average size of the amplicon-sequencing fragment). Estimates were obtained for  
327each population and globally using egglib v3.0.0b21 (Mita & Siol, 2012).

328

## 329Results

330

### 331Panel design for target sequencing enrichment

332

333**Marker discovery, genetic diversity, population structure and outlier detection.** We re-  
334sequenced the whole-genome of twenty-four individuals of *B. antarctica* collected from two



335 islands of the Antarctic Peninsula. A total of 196,799,812, 100bp-long paired-end reads were  
336 produced, corresponding to an average coverage of 16X per individual. Sequencing data of one  
337 individual, from Dream Island, was removed from the downstream analysis due to low yield. We  
338 applied a stringent quality control on the raw reads and on the called SNPs to minimize  
339 accumulating sequenc errors during steps of the reduced SNP panel design. Coverage was  
340 reduced to 13X and 11X after trimming and mapping (Figure S5A). We initially found 715,721  
341 variants including SNPs and INDELs. The stringent filter reduced the variants to 1,260 SNPs  
342 with an mean coverage of ~50X (Figure S5B). The final set of filtered SNPs contained only bi-  
343 allelic SNPs, with a PHRED quality score > 20 and an average 8.53% of missing data (with a  
344 maximum of 17.39%). We limited minimum and maximum depth and the missing data to  
345 minimize miscalling of heterozygous genotypes.

346

347 With the WGR SNPs, we were able to characterize within population allele frequencies using  
348 SNP markers and assess the population genetic structure with individual genotype data. The  
349 folded allele-frequency spectrum (AFS) showed an excess of intermediate-frequency variants  
350 for each population (Figure 1A). Since the folded AFS ranged from 1 to  $n$  number of alleles for  
351 each site (or  $1/2n$  to  $n/2n$ ) with  $n$  being the number of haploid genomes, the rightmost part of the  
352 AFS represents the number of loci that have an allele frequency equal to or close to 0.5. The p-  
353 values of Fisher's exact test were calculated globally (pooling the two populations) and for each  
354 population to evaluate the deviation of H-W proportions. The Q-Q plot showed the majority of  
355 loci deviated from the expected distribution of p-values. Globally, 57.03% of the loci (and ~55%  
356 in each population) deviated from the H-W proportions when no correction for multiple tests was  
357 applied (Figure S6). With a Bonferroni's correction, 37.03% globally deviated from the H-W  
358 proportion. The proportion of heterozygous genotypes observed globally and in each population  
359 were high: 0.616 globally; 0.715 in D1 and 0.739 in HP, compared to the expected proportion of  
360 0.344 globally; 0.395 in D1 and 0.404 in HP. We calculated within- and between-scaffolds  $R^2$   
361 and estimated LD decay and the population recombination rate ( $\rho = 4Nr$ ) using the Weir & Hill  
362 equation (Weir and Hill 1988). When populations were combined, the distance of half LD decay  
363 was 476bp, and for D1 and HP populations, half decay distances were 1072bp and 410bp  
364 (Figure S7). Population recombination rates,  $\rho$ , were ~4e-3 globally, and ~2e-3 and ~6e-3 for  
365 D1 and HP, respectively. Overall genetic structure measured with global  $F_{ST}$  was 0.028 (with  
366 bootstrap 95% confidence interval ranging from 0.022 to 0.032), and PCA showed two major  
367 clusters on each side of the first PC that represented each population (Figure 1B).

368

369 The Bayesian method implemented in BAYESCAN did not find significant outliers even with a  
370 FDR of 10%. Since an excess of heterozygous loci in our SNP data can indicate a deviation in  
371 the island model, and can bias the expected global  $F_{ST}$  values, we applied a more flexible  
372 criteria to accept a locus as an outlier. We found eight outliers by considering loci that had a  
373 posterior  $F_{ST}$  value higher than the upper 95% HPD interval. The method implemented in  
374 OUTFLANK found 31 outliers. We found 8 outlier loci common to both analyses (Figure 2). The  
375 outlier SNP with the highest posterior  $F_{ST}$  was found inside a gene that encodes a putative  
376 vitellogenin protein where the alternative allele is a non-synonymous mutation. The second

377 outlier SNP found in the same gene had a lower posterior  $F_{ST}$ , but both SNPs had contrasting  
378 values. It is likely this outlier was polymorphic in D1, but was fixed for the reference allele in HP.  
379 The second highest posterior  $F_{ST}$  belonged to an uncharacterized protein, and the alternative  
380 allele was a synonymous mutation (Table S1).

381

382 **Isolation of candidate markers and panel design.** Third-eight SNPs were identified as  
383 informative after ranking PCA scores. Four of these SNPs were previously identified as outliers  
384 with the highest posterior  $F_{ST}$ ; twelve were identified inside an open-reading frame, but without  
385 functional information. Additionally, ten randomly chosen were added (Figure 3A). We included  
386 four SNPs in genes that may be associated with a physiological mechanism to survive in  
387 Antarctica: one SNP in the gene *PEPCK* (associated with cold and drought tolerance, Teets *et al.*  
388 *al.* (2012b)); one SNP in *Buffy* which regulates cell death in *D. melanogaster* (Danial &  
389 Korsmeyer, 2004; Quinn, 2003); one SNP in the ecdysone receptor *EcR* (Hill *et al.*, 2013), and  
390 a SNP in the RNA-interference machinery *Dicer* (Dicer, Lee *et al.* (2004)). In total, 55 SNPs in  
391 47 amplicons were targeted by the panel. Primers were designed following the FAA system  
392 recommendations.

393 Two out of 47 primer pairs did not uniquely align to their expected genomic region and were  
394 discarded (reads from paralogous genomic region can bias the genotype calls towards  
395 heterozygous calls, Hohenlohe *et al.* (2011); McKinney *et al.* (2016); Ravindran *et al.* (2018)).  
396 The alignment of predicted amplicon sequences to other amplicons sequences showed that  
397 three pairs of sequences had overlapping regions at one of the sequence ends. These overlaps  
398 were found in amplicons that came from adjacent regions of the genome. The partial alignment  
399 of reads to other regions can also cause an excess of heterozygous calls. In our pipeline we  
400 minimized the chance of partial alignment by imposing a stringent limit on read similarity allowed  
401 for read clustering. The partial alignment was removed using the amplicon sequence as the  
402 reference and a more stringent threshold for read alignment. As an example of the effectiveness  
403 of the mentioned steps, the targeted SNPs Bant\_tg26 and Bant\_tg27 were found in the  
404 overlapping regions, but the amount of heterozygous calls is proportional to the other targeted  
405 SNPs (Figure S8). For other primer sets, alignment of predicted amplicon sequences to the *B.*  
406 *antarctica* scaffolds showed the best hit was the expected scaffold and position.

407

#### 408 **Validation of the panel for target sequencing enrichment**

409

410 **SNP calling for amplicon sequencing.** FAA was 81% successful in recovering a targeted  
411 SNPs (45 out of 55 targeted SNPs). Seven targeted SNPs that were not recovered by FAA had  
412 adequate coverage but only had the reference allele, and three targeted SNPs (all in the *Buffy*  
413 gene) were not recovered (Figure S9B). We discarded an additional 3 SNPs (Bant\_tgt10,  
414 Bant\_tgt40, and Bant\_tgt55) because they had different genotypes compared to the WGR  
415 SNPs, despite passing QC filters. Therefore, we used 42 out of 55 targeted SNPs to compare  
416 WGR and amplicon-sequencing to evaluate their ability to recover true genotypes (Figure 3B).

417

418 **Validation of targeted SNPs and comparison between WGR and amplicon-seq SNPs.** The

419 average percentage of genotype similarities between sequencing protocols was 59.5%. This  
420 number was low because the high sequence depth of amplicon-sequencing (~3000x) allowed  
421 us to reduce the number of homozygous calls being called as heterozygous (false positives)  
422 and heterozygous calls being called as homozygous (false negatives). The proportion of false  
423 positives and false negatives that were resolved by amplicon-sequencing were 6.2% and  
424 22.2%, respectively. With amplicon-sequencing, we were able to confidently call new  
425 heterozygous genotypes that increased the proportion of within-individual heterozygous  
426 genotypes (Figure 3C). We were also able to reduce the amount of missing data within-  
427 individual and within-targeted SNPs (Figure 3D), although in one SNP it increased. When we  
428 compared the intra-locus estimates of  $H_E$ ,  $\pi$ , Tajima's D and  $\Theta_W$  calculated for each targeted  
429 SNP we could see differences between the sequencing protocols, but the average estimates  
430 were concordant (except for the  $H_E$ , Figure S10 and S11). We were also able to confirm  
431 genotypes of outliers discovered with WGR. The outlier with the highest posterior  $F_{ST}$  had the  
432 same genotype in both sequencing data, two outliers had the proportion of heterozygosity  
433 increased (Figure S12), and one was not polymorphic with the amplicon-sequencing data.

434

435 Amplicon-seq SNPs revealed the overall pattern of an excess of intermediate-frequency  
436 variants that was observed in the folded allele-frequency spectrum of WGR SNPs (Figure 1C).  
437 amplicon-seq SNP also showed a similar pattern of overall genetic differentiation between  
438 populations identified with PCA (Figure 1D). However, the global estimate of Weir &  
439 Cockerham's  $F_{ST}$  for Amplicon-seq SNP was higher (0.083, 95% CI of 0.046 to 0.122) than the  
440 estimates obtained with WGR SNPs (0.028, 95% CI of 0.022 to 0.032). Estimates of intra-locus  
441 summary statistics were similar, but estimates obtained with amplicon-seq SNPs showed lower  
442 variance for all summary statistics except for (Figure 4).

443

#### 444 Discussion

445

446 For many population and conservation genetic studies with non-model organisms, it may be  
447 cost-prohibitive to generate high density WGR data sets. In this study, we show how the use of  
448 low-coverage, whole-genome re-sequencing (lcWGR) allows the identification of an informative  
449 set of SNP markers for rapid and reliable targeted enrichment genotyping. A cost-effective  
450 lcWGR was used to produce individual sequencing data to create a reduced set of informative  
451 SNPs for a SNP genotyping panel. Using the non-model dipteran, *B. antarctica*, the resultant  
452 SNP panel uncovered similar patterns of genetic diversity and population genetic structure as  
453 the lcWGR data set.

454

455 Coverage and quality of the lcWGR was low, limiting the identification of reliable variation. Using  
456 restrictive filters, we kept less than 1% of the identified variants, retaining SNPs in regions that  
457 had an average coverage higher than the expected 11X. The strict filtering came at a cost of  
458 discarding most rare to low-frequency variants (Fuentes-Pardo & Ruzzante, 2017) that may  
459 have shifted the folded-AFS spectrum. The low sample sizes for lcWGR also contributed to the  
460 AFS shift since the likelihood of a rare variant to be included was initially low. To minimize

461 sample bias on the estimation of population genetic parameters (Albrechtsen, Nielsen &  
462 Nielsen, 2010; Fumagalli, 2013) and on the design of a reduced set of SNPs (Anderson, 2010;  
463 Ding *et al.*, 2011; Henriques *et al.*, 2018; Mariette *et al.*, 2002), a larger sample size would be  
464 required. However, in some cases with non-model organisms, large initial sample sizes may be  
465 challenging due to costs or unavailability of collections. While obtaining *B. antarctica* can be  
466 difficult from an isolated continent, we were fortunate to also have a complete genome for *B.*  
467 *antarctica*, which helped identify an informative set of markers. Regardless, focusing on  
468 medium-frequency to common SNPs increases the probability of recovering targeted SNPs and  
469 desired population genetic parameters for additional and distant populations.

470

471 The observed heterozygosity ( $H_o$ ) for the majority of WGR SNPs were higher compared to the  
472 expected heterozygosity ( $H_e$ ). The shift in folded-AFS also indicated accumulation of SNPs with  
473 a high proportion of heterozygous genotypes, indicating deviation from mutation-drift  
474 equilibrium. Both may be the consequence of the application of a hard filter on WGR SNPs, or  
475 alternatively may indicate two possible biological scenarios 1) strong bottlenecks events, and 2)  
476 a large population (with large  $N_e$ ) that underwent a recent admixture event with a close, but  
477 large and isolated, population. We can rule out an effect from QC filters since different  
478 sequencing protocols produced similar results (see below). The two possible biological  
479 scenarios, as well a combination of admixture and successive bottlenecks, are likely given the  
480 complex dynamics of seasonal freezing and thawing that is prevalent in Antarctica. However,  
481 with only 2 populations included in this study, inferences on demography would need additional  
482 sampling among several islands inhabited by *B. antarctica*.

483

484 In a scenario with strong stochastic changes in allele frequency and/or deviation from the  
485 island-model of migration with recent admixture (Bonhomme *et al.*, 2010; Whitlock & Lotterhos,  
486 2015), we had limited power to identify outlier loci with  $F_{ST}$ -based methods. Nonetheless, the  
487 combined methods identified one putative outlier locus that might be associated with stress  
488 adaptation in population D1, where all but one individual were heterozygous. The *B. antarctica*  
489 reference genome predicted that the alternative allele changed the amino acid from serine to  
490 arginine in a putative vitellogenin-A1 gene. Genotyping of other populations will allow us to see  
491 if differences in allele frequencies for the alternative allele exist.

492

493 The goal of our reduced SNP set was to recover and estimate summary statistics ( $H_e$ ,  $\pi$ ,  
494 Tajima's  $D$ ,  $\Theta_w$ ) with some degree of similarity with WGR SNPs (similar average estimates and  
495 proportional variance range) and to rapidly assess natural populations. Despite differences in  
496 platforms, both produced relatively congruent results for the overall genetic diversity and  
497 population structure. It is interesting that we did not observe major discordance for the summary  
498 statistics among data types, as we obtained similar patterns for the folded-AFS, similar average  
499 estimates of  $H_e$ ,  $\pi$ , and  $\Theta_w$ , and similar individual assignments with PCA. We might attribute  
500 the ability of both WGR and Amplicon-seq SNPs to recover similar patterns of genetic diversity

501and population structure to the small genome of *B. antarctica*. Evolutionary events such as  
502recent admixture and bottlenecks produce genome wide patterns on the genome; in small  
503genomes their impact might be more extreme. In this case, the lcWGR data likely provided loci  
504informative about overall patterns of the genome (e.g. diversity and demography). We had  
505limited power to identify loci-specific features (e.g. selection), since bottlenecks and admixture  
506could remove such signals. Nonetheless, for conservation genetic research, estimating genetic  
507diversity and population structure is a more likely first step before identifying locus-specific  
508adaptation.

509

510Application of the reduced SNP strategy with the pipeline was shown to be effective for  
511revealing major features underlying the evolutionary history of *B. antarctica*. We also observed  
512strong clustering and differentiation among islands less than 8 kms apart, indicating some  
513degree of isolation. These SNPs can be used more economically in multiple populations to  
514better understand its current genetic diversity, describe global demography events, and predict  
515any threats to extinction. For periodic genetic monitoring of this species, the ability to rapidly  
516estimate genetic diversity is critical to identify issues that may be responding to drastic  
517environmental changes across its wide range of inhabited Antarctic islands.

518

519We also created a pipeline that automates the processing of Illumina's short reads, produced by  
520double-PCR amplification (that can be used with any amplicon sequencing protocol), and to  
521generate full genotypes for individuals. With the amplicon-seq's high coverage, this pipeline  
522reduces false positives and negatives that impact the correct calling of heterozygous genotypes.  
523The step-by-step guide for marker discovery and the pipeline designed for amplicon-sequencing  
524can be used to isolate informative SNPs and rapidly genotype any non-model species.  
525Amplicon-sequencing can not only speed-up the genotyping of endangered species but also  
526facilitate the transition from conservation genetics to genomics (Meek & Larson, 2019; Taylor *et*  
527*al.*, 2017). The pipeline is flexible enough for amplicon-sequencing with different degrees of  
528amplicons and samples, and can also be used to prepare the data of low-coverage amplicon-  
529sequencing experiments that incorporate some error (e.g. ANGSD, Korneliussen *et al.* (2014)).  
530For those with less bioinformatic experience, our pipeline can rapidly provide input files needed  
531for more user-friendly, non-command line, population genetic software.

532

### 533Conclusion

534

535In summary, we show how amplicon-sequencing can be an alternative for population WGR  
536when the goal is to acquire reliable genotypic information for many individuals and populations.  
537When budget and bioinformatic experience limit the number of individuals to be sequenced with  
538a decent sequence coverage, amplicon-sequencing offers a more affordable method compared  
539to WGR or pool-seq. The process of isolating informative SNPs for targeted sequencing allows  
540accurate recovery of fundamental estimates of genetic diversity and demographic patterns that  
541are very similar to those generated by WGR. The guidelines presented here also include a  
542pipeline developed to automate the processing of raw data produced by a combination of high

543throughput multiplex PCR and short-read sequencing into easily formatted genotyping input  
544files. Our pipeline not only automates the genotyping but also reduces accumulation of  
545sequencing errors, thereby increasing quality of genotyping calls. We believe this approach will  
546be beneficial to many other non-model systems where questions concerning population and  
547conservation genetic structure must be answered quickly to generate baseline data and predict  
548future changes under climate change.

549

#### 550**Acknowledgements**

551We would like to thank M. Hernandez-Garcia at the MCIC for assistance with primer design and  
552the FAA. Sarah Rudawsky helped with DNA extractions and quality assessment. Funding was  
553provided by NSF Division of Polar Programs (35000404): PLR-1341393.

## 554References

555

556 Albrechtsen, A., Nielsen, F. C. & Nielsen, R. (2010). Ascertainment biases in SNP Chips  
557 affect measures of population divergence. *Molecular Biology and Evolution*, 27(11), 2534-  
558 2547. doi:10.1093/molbev/msq148

559 Allendorf, F. W. (2017). Genetics and the conservation of natural populations: allozymes  
560 to genomes. *Molecular Ecology*, 26(2), 420-430. doi:10.1111/mec.13948

561 Allegrucci, G., Carchini, G., Todisco, V., Convey, P., Sbordoni, V.. (2006). A molecular  
562 phylogeny of antarctic chironomidae and its implications for biogeographical history. *Polar*  
563 *Biology* 29(4):320–326. doi:10.1007/s00300-005-0056-7

564 Altschul, S. F., Gish, W., Miller, W., Myers, E. W. & Lipman, D. J. (1990). Basic local  
565 alignment search tool. *Journal of Molecular Biology*, 215(3), 403-410. doi:10.1016/s0022-  
566 2836(05)80360-2

567 Anderson, E. C. (2010). Assessing the power of informative subsets of loci for population  
568 assignment: standard methods are upwardly biased. *Molecular Ecology Resources*, 10(4),  
569 701-710. doi:10.1111/j.1755-0998.2010.02846.x

570 Baird, N.A., Etter, P. D., Atwood, T.S, Currey, M.C., Shiver, A. L., Lewis, Z. A., Selker, E.  
571 U., ... Johnson, E. A. (2008). Rapid SNP discovery and genetic mapping using sequenced  
572 RAD markers. *PLoS Genetics*, 3(10), e3376-7. Doi:10.1371/journal.pone.0003376

573 Bolger, A. M., Lohse, M. & Usadel, B. (2014). Trimmomatic: a flexible trimmer for Illumina  
574 sequence data. *Bioinformatics*, 30(15), 2114-2120. doi:10.1093/bioinformatics/btu170

575 Bonhomme, M., Chevalet, C., Servin, B., Boitard, S., Abdallah, J., Blott, S. &  
576 SanCristobal, M. (2010). Detecting selection in population trees: the Lewontin and  
577 Krakauer test extended. *Genetics*, 186(1), 241-262. doi:10.1534/genetics.110.117275

578 Bowden, R., MacFie, T. S., Myers, S., Hellenthal, G., Nerrienet, E., Bontrop, R. E.,  
579 Freeman, C., ... Mundy N. I. (2012). Genomic tools for evolution and conservation in the  
580 Chimpanzee: *Pan troglodytes ellioti* is a genetically distinct population. *PLoS Genetics*,  
581 8(3), e1002504. doi:10.1371/journal.pgen.1002504

582 Brown, A. P., McGowan, K. L., Schwarzkopf, E. J., Greenway, R., Rodriguez, L. A.,  
583 Tobler, M. & Kelley, J. L. (2019). Local ancestry analysis reveals genomic convergence in  
584 extremophile fishes. *Philosophical Transactions of the Royal Society B: Biological*  
585 *Sciences*, 374(1777), 20180240. doi:10.1098/rstb.2018.0240

586 Campbell, N. R., Harmon, S. A. & Narum, S. R. (2014). Genotyping-in-Thousands by  
587 sequencing (GT-seq): a cost effective SNP genotyping method based on custom amplicon  
588 sequencing. *Molecular Ecology Resources*, 15(4), 855-867. doi:10.1111/1755-0998.12357

589 Convey, P. & Block, W. (1996). Antarctic Diptera: ecology, physiology and distribution.  
590 *European Journal of Entomology*, 93 (1), 1-13.

- 591 Danecek, P., Auton, A., Abecasis, G., Albers, C. A., Banks, E., DePristo, M. A.,  
592 Handsaker, R. E., ... Durbin, R. (2011). The variant call format and VCFtools.  
593 *Bioinformatics*, 27(15), 2156-2158. doi:10.1093/bioinformatics/btr330
- 594 Danial, N. N. & Korsmeyer, S. J. (2004). Cell death: critical control points. *Cell*, 116(2),  
595 205-219. doi:10.1016/s0092-8674(04)00046-7
- 596 Ding, L., Wiener, H., Abebe, T., Altaye, M., Go, R. C. P., Kercsmar, C., Grabowski, G., ...  
597 Baye, T. M. (2011). Comparison of measures of marker informativeness for ancestry and  
598 admixture mapping. *BMC Genomics*, 12(1), 622. doi:10.1186/1471-2164-12-622
- 599 Edgar, R. C. (2010). Search and clustering orders of magnitude faster than BLAST.  
600 *Bioinformatics*, 26(19), 2460-2461. doi:10.1093/bioinformatics/btq461
- 601 Ekblom, R. & Galindo, J. (2010). Applications of next generation sequencing in molecular  
602 ecology of non-model organisms. *Heredity*, 107(1), 1-15. doi:10.1038/hdy.2010.152
- 603 Fischer, M. C., Rellstab, C., Leuzinger, M., Roumet, M., Gugerli, F., Shimizu, K. K., ...  
604 Widmer, A. (2017). Estimating genomic diversity and population differentiation - an  
605 empirical comparison of microsatellite and SNP variation in *Arabidopsis halleri*. *BMC*  
606 *Genomics*, 18(1), 69. doi:10.1186/s12864-016-3459-7
- 607 Foll, M. & Gaggiotti, O. (2008). A genome-scan method to identify selected loci  
608 appropriate for both dominant and codominant markers: a bayesian perspective.  
609 *Genetics*, 180(2), 977-993. doi:10.1534/genetics.108.092221
- 610 Fuentes-Pardo, A. P. & Ruzzante, D. E. (2017). Whole-genome sequencing approaches  
611 for conservation biology: advantages, limitations and practical recommendations.  
612 *Molecular Ecology*, 26(20), 5369-5406. doi:10.1111/mec.14264
- 613 Fumagalli, M. (2013). Assessing the effect of sequencing depth and sample size in  
614 population genetics inferences. *PLoS ONE*, 8(11), e79667.  
615 doi:10.1371/journal.pone.0079667
- 616 Garrison, E. & Marth, G. (2012). Haplotype-based variant detection from short-read  
617 sequencing. [arxiv.org/abs/1207.3907](https://arxiv.org/abs/1207.3907)
- 618 Goudet, J. (2005). hierfstat, a package for r to compute and test hierarchical F-statistics.  
619 *Molecular Ecology Notes*, 5(1), 184-186. doi:10.1111/j.1471-8286.2004.00828.x
- 620 Hayward, S. A. L., Rinehart, J. P., Sandro, L. H., Lee, R. E. & Denlinger, D. L. (2007).  
621 Slow dehydration promotes desiccation and freeze tolerance in the Antarctic midge  
622 *Belgica antarctica*. *Journal of Experimental Biology*, 210(5), 836-844.  
623 doi:10.1242/jeb.02714
- 624 Henriques, D., Parejo, M., Vignal, A., Wragg, D., Wallberg, A., Webster, M. T. & Pinto, M.  
625 A. (2018). Developing reduced SNP assays from whole-genome sequence data to  
626 estimate introgression in an organism with complex genetic patterns, the Iberian  
627 honeybee (*Apis mellifera iberiensis*). *Evolutionary Applications*, 11(8), 1270-1282.



- 628 doi:10.1111/eva.12623
- 629 Hill, R. J., Billas, I. M. L., Bonneton, F., Graham, L. D. & Lawrence, M. C. (2013).  
630 Ecdysone receptors: from the Ashburner model to structural biology. *Annual Review of*  
631 *Entomology*, 58(1), 251-271. doi:10.1146/annurev-ento-120811-153610
- 632 Hohenlohe, P. A., Amish, S. J., Catchen, J. M., Allendorf, F. W. & Luikart, G. (2011). Next-  
633 generation RAD sequencing identifies thousands of SNPs for assessing hybridization  
634 between rainbow and westslope cutthroat trout. *Molecular Ecology Resources*, 11, 117-  
635 122. doi:10.1111/j.1755-0998.2010.02967.x
- 636 Hulsegge, B., Calus, M. P. L., Windig, J. J., Hoving-Bolink, A. H., Eijndhoven, M. H. T. M.-  
637 v. & Hiemstra, S. J. (2013). Selection of SNP from 50K and 777K arrays to predict breed  
638 of origin in cattle. *Journal of Animal Science*, 91(11), 5128-5134. doi:10.2527/jas.2013-  
639 6678
- 640 Jombart, T. (2008). adegenet: a R package for the multivariate analysis of genetic  
641 markers. *Bioinformatics*, 24(11), 1403-1405. doi:10.1093/bioinformatics/btn129
- 642 Kelley, J. L., Peyton, J. T., Fiston-Lavier, A.-S., Teets, N. M., Yee, M.-C., Johnston, J. S.,  
643 Bustamante, C. D., ... Denlinger, D. L. (2014). Compact genome of the Antarctic midge is  
644 likely an adaptation to an extreme environment. *Nature Communications*, 5(1), 4611.  
645 doi:10.1038/ncomms5611
- 646 Korneliussen, T. S., Albrechtsen, A. & Nielsen, R. (2014). ANGSD: analysis of next  
647 generation sequencing data. *BMC Bioinformatics*, 15(1), 356. doi:10.1186/s12859-014-  
648 0356-4
- 649 Langmead, B. & Salzberg, S. L. (2012). Fast gapped-read alignment with Bowtie 2.  
650 *Nature Methods*, 9(4), 357-359. doi:10.1038/nmeth.1923
- 651 Larson, W. A., Dann, T. H., Limborg, M. T., McKinney, G. J., Seeb, J. E. & Seeb, L. W.  
652 (2019). Parallel signatures of selection at genomic islands of divergence and the major  
653 histocompatibility complex in ecotypes of sockeye salmon across Alaska. *Molecular*  
654 *Ecology*, 28(9), 2254-2271, . doi:10.1111/mec.15082
- 655 Lee, Y. S., Nakahara, K., Pham, J. W., Kim, K., He, Z., Sontheimer, E. J. & Carthew, R.  
656 W. (2004). Distinct roles for Drosophila Dicer-1 and Dicer-2 in the siRNA/miRNA silencing  
657 pathways. *Cell*, 117(1), 69-81. doi:10.1016/s0092-8674(04)00261-2
- 658 Li, H., Handsaker, B., Wysoker, A., Fennell, T., Ruan, J., Homer, N., Marth, G., ... 1000  
659 Genome Project Data Processing Subgroup (2009). The sequence alignment/map format  
660 and SAMtools. *Bioinformatics*, 25(16), 2078-2079. doi:10.1093/bioinformatics/btp352
- 661 Mace, G. M. (2004). The role of taxonomy in species conservation. *Philosophical*  
662 *Transactions of the Royal Society of London. Series B: Biological Sciences*, 359(1444),  
663 711-719. doi:10.1098/rstb.2003.1454
- 664 Mariette, S., Corre, V. L., Austerlitz, F. & Kremer, A. (2002). Sampling within the genome

- 665 for measuring within-population diversity: trade-offs between markers. *Molecular Ecology*,  
666 11(7), 1145-1156. doi:10.1046/j.1365-294x.2002.01519.x
- 667 McKenna, A., Hanna, M., Banks, E., Sivachenko, A., Cibulskis, K., Kernytzky, A.,  
668 Garimella, K., ... DePristo M. A. (2010). The genome analysis toolkit: a MapReduce  
669 framework for analyzing next-generation DNA sequencing data. *Genome Research*,  
670 20(9), 1297-1303. doi:10.1101/gr.107524.110
- 671 McKinney, G. J., Waples, R. K., Seeb, L. W. & Seeb, J. E. (2016). Paralogs are revealed  
672 by proportion of heterozygotes and deviations in read ratios in genotyping-by-sequencing  
673 data from natural populations. *Molecular Ecology Resources*, 17(4), 656-669.  
674 doi:10.1111/1755-0998.12613
- 675 Meek, M. H. & Larson, W. A. (2019). The future is now: amplicon sequencing and  
676 sequence capture usher in the conservation genomics era. *Molecular Ecology Resources*,  
677 19(4), 795-803. doi:10.1111/1755-0998.12998
- 678 Milano, I., Babbucci, M., Cariani, A., Atanassova, M., Bekkevold, D., Carvalho, G.R.,  
679 Espiñeira M., ... Bargelloni, L. (2013). Outlier SNP markers reveal fine-scale genetic  
680 structuring across European hake populations (*Merluccius merluccius*). *Molecular*  
681 *Ecology*, 23(1), 118-135. doi:10.1111/mec.12568
- 682 Mita, S. D. & Siol, M. (2012). EggLib: processing, analysis and simulation tools for  
683 population genetics and genomics. *BMC Genetics*, 13(1), 27. doi:10.1186/1471-2156-13-  
684 27
- 685 Paradis, E. (2010). pegas: an R package for population genetics with an integrated-  
686 modular approach. *Bioinformatics*, 26(3), 419-420. doi:10.1093/bioinformatics/btp696
- 687 Peterson, B. K., Weber, J. N., Kay, E. H., Fisher, H. S. & Hoekstra, H. E. (2012). Double  
688 digest RADseq: an inexpensive method for de novo SNP discovery and genotyping in  
689 model and non-model species. *PLoS ONE*, 7(5), e37135.  
690 doi:10.1371/journal.pone.0037135
- 691 Prado-Martinez, J., Sudmant, P.H., Kidd, J.M., Li, H., Kelley, J.L., Lorente-Galdos, B.,  
692 Veeramah, K.R., ... Marques-Bonet T., (2013). Great ape genetic diversity and population  
693 history. *Nature*, 499(7459), 471-475. doi:10.1038/nature12228
- 694 Quinn, L. (2003). Buffy, a Drosophila Bcl-2 protein, has anti-apoptotic and cell cycle  
695 inhibitory functions. *The EMBO Journal*, 22(14), 3568-3579. doi:10.1093/emboj/cdg355
- 696 Ravindran, P. N., Bentzen, P., Bradbury, I. R. & Beiko, R. G. (2018). PMERGE:  
697 Computational filtering of paralogous sequences from RAD-seq data. *Ecology and*  
698 *Evolution*, 8(14), 7002-7013. doi:10.1002/ece3.4219
- 699 Rinehart, J. P., Hayward, S. A. L., Elnitsky, M. A., Sandro, L. H., Lee, R. E. & Denlinger,  
700 D. L. (2006). Continuous up-regulation of heat shock proteins in larvae, but not adults, of a  
701 polar insect. *Proceedings of the National Academy of Sciences*, 103(38), 14223-14227.

- 702 doi:10.1073/pnas.0606840103
- 703 Supple, M. A. & Shapiro, B. (2018). Conservation of biodiversity in the genomics era.  
704 *Genome Biology*, 19(1), 131. doi:10.1186/s13059-018-1520-3
- 705 Tajima, F. (1989). Statistical method for testing the neutral mutation hypothesis by DNA  
706 polymorphism. *Genetics*, 123(3), 585-595.
- 707 Taylor, H. R., Dussex, N. & van Heezik, Y. (2017). Bridging the conservation genetics gap  
708 by identifying barriers to implementation for conservation practitioners. *Global Ecology*  
709 *and Conservation*, 10, 231-242. doi:10.1016/j.gecco.2017.04.001
- 710 Teets, N. M., Kawarasaki, Y., Lee, R. E. & Denlinger, D. L. (2012b). Expression of genes  
711 involved in energy mobilization and osmoprotectant synthesis during thermal and  
712 dehydration stress in the Antarctic midge, *Belgica antarctica*. *Journal of Comparative*  
713 *Physiology B*, 183(2), 189-201. doi:10.1007/s00360-012-0707-2
- 714 Teets, N. M., Peyton, J. T., Colinet, H., Renault, D., Kelley, J. L., Kawarasaki, Y., ...,  
715 Denlinger D. L. (2012a). Gene expression changes governing extreme dehydration  
716 tolerance in an Antarctic insect. *Proceedings of the National Academy of Sciences*,  
717 109(50), 20744-20749. doi:10.1073/pnas.1218661109
- 718 Watterson, G. A. (1975). On the number of segregating sites in genetical models without  
719 recombination. *Theoretical Population Biology*, 7(2), 256-276.
- 720 Whitlock, M. C. & Lotterhos, K. E. (2015). Reliable detection of loci responsible for local  
721 adaptation: inference of a null model through trimming the distribution of FST. *The*  
722 *American Naturalist*, 186(S1), S24-S36. doi:10.1086/682949
- 723 Wilkinson, S., Wiener, P., Archibald, A. L., Law, A., Schnabel, R. D., McKay, S.D., ...  
724 Ogden R. (2011). Evaluation of approaches for identifying population informative markers  
725 from high density SNP Chips . *BMC Genetics*, 12(1), 45. doi:10.1186/1471-2156-12-45
- 726 Wijeratne, S. & Pavinato, V. A. C. (2018). PypeAmplicon v1.0: Python pipeline for analysis  
727 of amplicon data. *Zenodo*. doi:10.5281/zenodo.1490421
- 729 Yang, S., Fresnedo-Ramírez, J., Wang, M., Cote, L., Schweitzer, P., Barba, P., Takacs,  
730 E.M., ... Sun, Q. (2016). A next-generation marker genotyping platform (AmpSeq) in  
731 heterozygous crops: a case study for marker-assisted selection in grapevine. *Horticulture*  
732 *Research*, 3(1), 16002. doi:10.1038/hortres.2016.2m,
- 733
- 734

### 735 **Data availability**

736

737 WGR and amplicon-sequencing data are available at NCBI BioProject accession numbers:

738 PRJNA565001 and PRJNA565153. The sequence of each primer pair, the reference amplicons

739 (fasta file) and R scripts are available at <https://github.com/vitorpavinato/belgicaampliconseq>.

740 The pipeline to process amplicon-sequencing raw data – PypeAmplicon – is available at zenodo

741 (doi:10.5281/zenodo.1490421) and on GitHub (<https://github.com/vitorpavinato/PypeAmplicon>).

742

### 743 **Author Contributions**

744 A.P.M., D.L.D., T.M., and V.A.C.P. designed the research; V.A.C.P analyzed the WGS and the

745 amplicon-sequencing data; V.A.C.P and D.S developed the reduced SNP panel; V.A.C.P.

746 conduct laboratory work on the amplicon-sequencing; A.P.M., and T.M. provided support for lab

747 work; S.W and V.A.C.P developed the amplicon-sequencing pipeline; S.W provided

748 bioinformatics consultancy; V.A.C.P., A.P.M., and D.L.D. wrote the manuscript.

## 749 **Figure legends**

750

751 **Figure 1. Folded AFS and PCA for lcWGR and amplicon-sequencing SNPs.** A) Folded-AFS  
752 summarizing the allele frequency distribution of SNPs obtained with lcWGR. B) PCA for  
753 lcWGR. C) the folded-AFS of SNPs obtained with amplicon-sequencing. D) PCA for amplicon-  
754 sequencing.

755

756 **Figure 2.  $F_{ST}$ -based outlier detection analysis.** Green represents SNPs detected as outliers  
757 by OUTFLANK and in pink are the SNPs with posterior  $F_{ST}$  higher than the upper limit of the  
758 95%  $F_{ST}$  highest posterior density (HDP) interval.

759

760 **Figure 3. Summary of the performance of amplicon-sequencing for targeted SNPs.** A) the  
761 type and number of SNPs included in the SNP panel. B) the number of targeted SNPs that were  
762 recovered with the amplicon-sequencing. C and D) improved coverage obtained and reduced  
763 missing data with the amplicon-sequencing.

764

765 **Figure 4. Comparison between summary statistics calculated with lcWGR and amplicon-  
766 sequencing SNPs.** A) Expected heterozygosity -  $H_E$ ; B) nucleotide diversity -  $\pi$ ; C)  
767 Watterson's estimator -  $\Theta_w$ ; and D) Tajima's D. In each plot the global and with-population  
768 summary statistic for each population were compared between sequencing protocol: WGR and  
769 Amplicon-sequencing. Dots represents the over-dispersed estimates.

**(A)**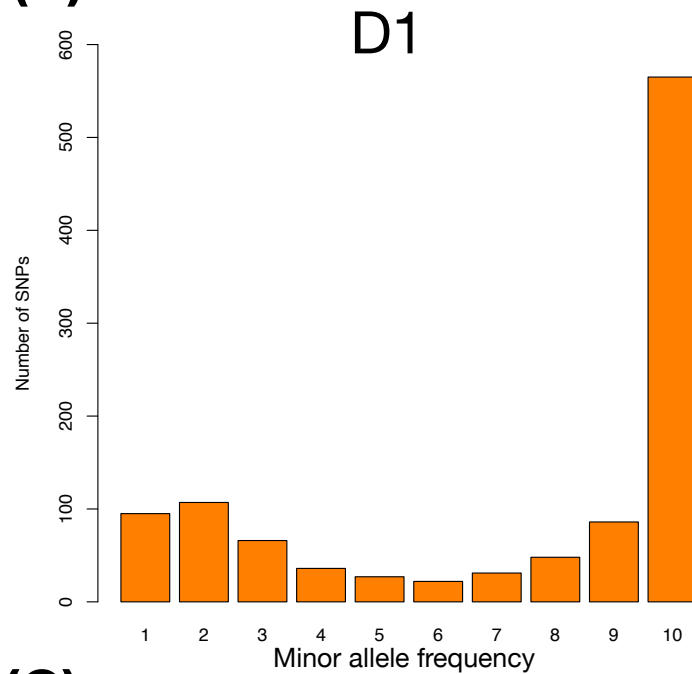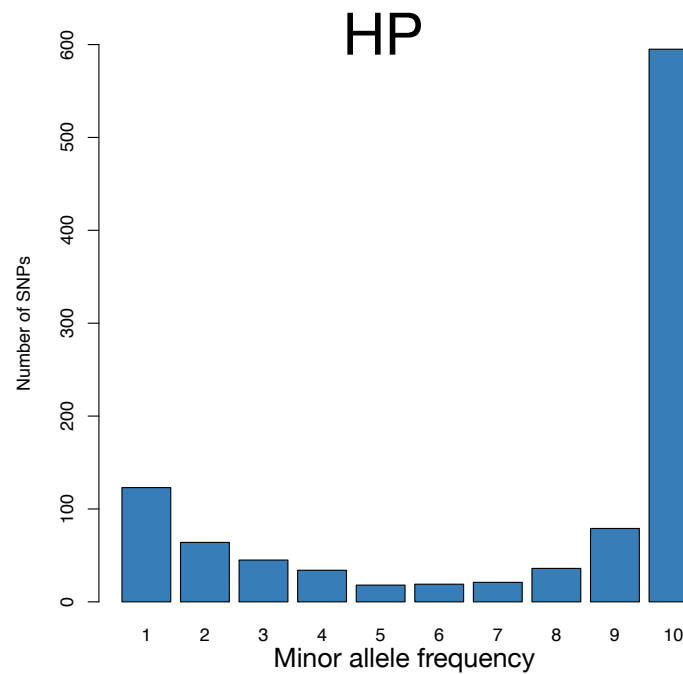**(B)**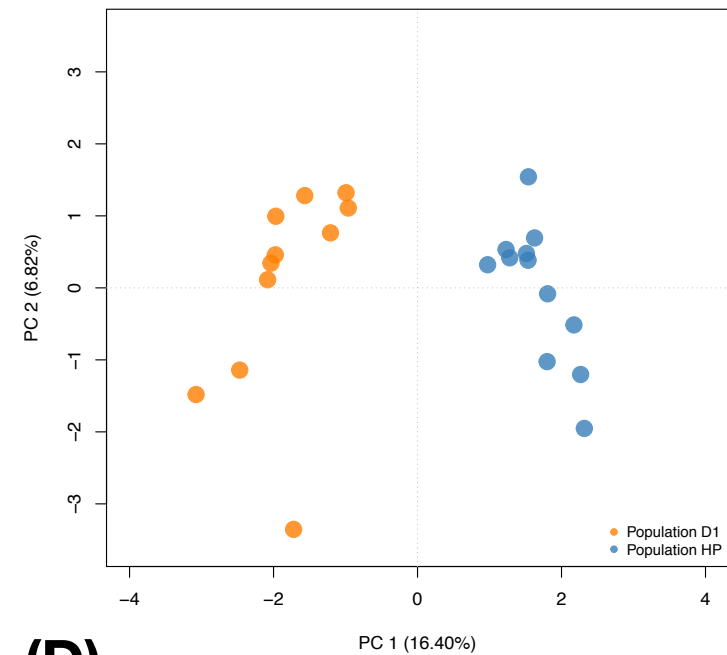

WGR SNPs

**(C)**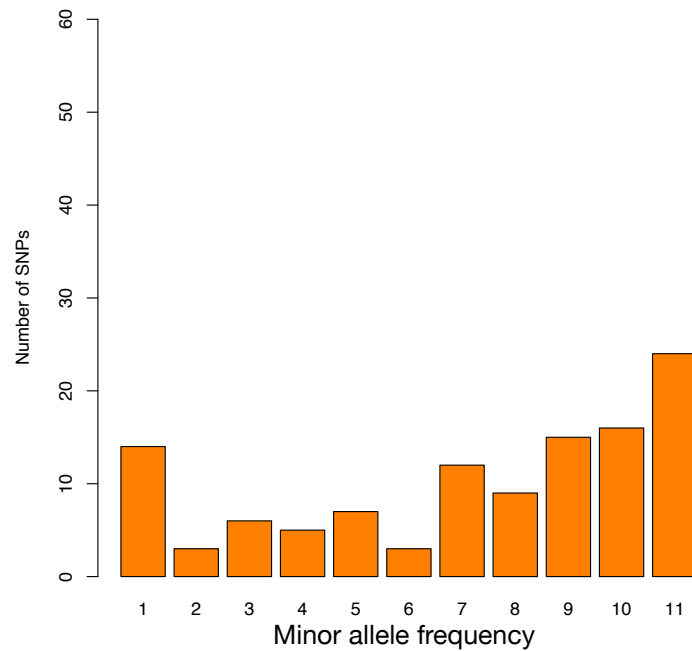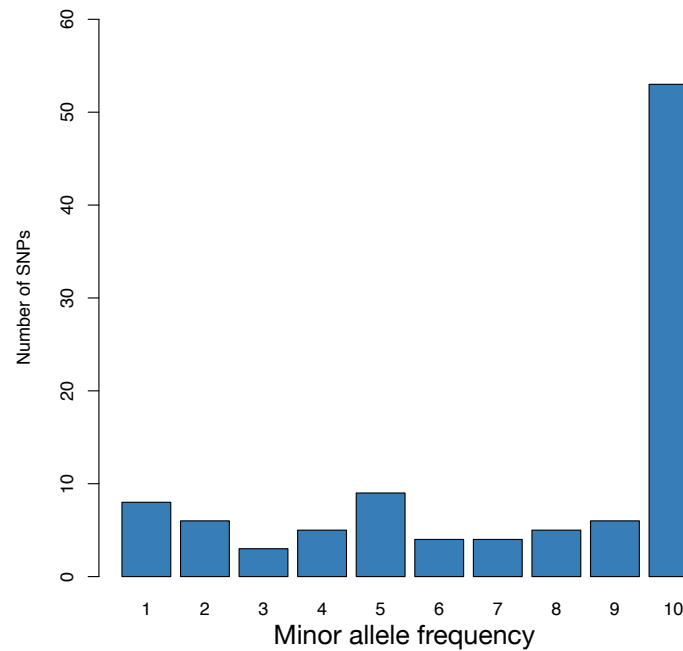**(D)**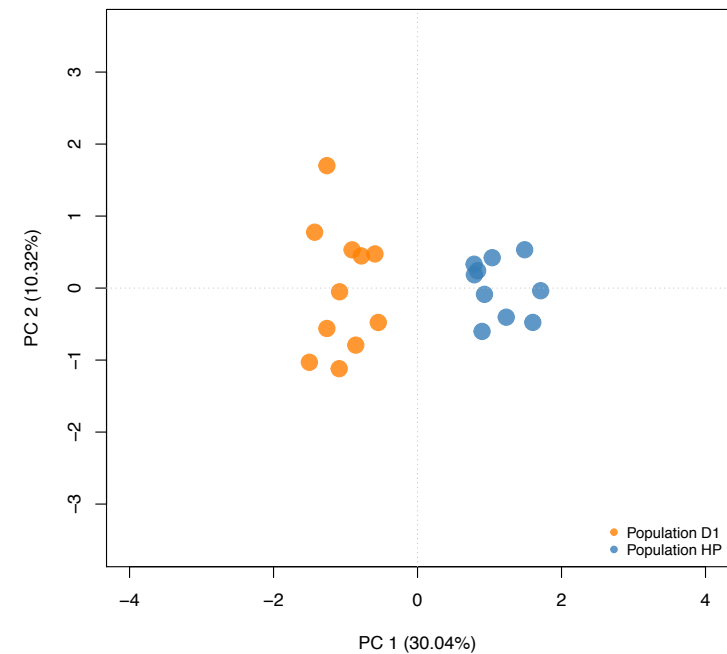

Amplicon-seq SNPs

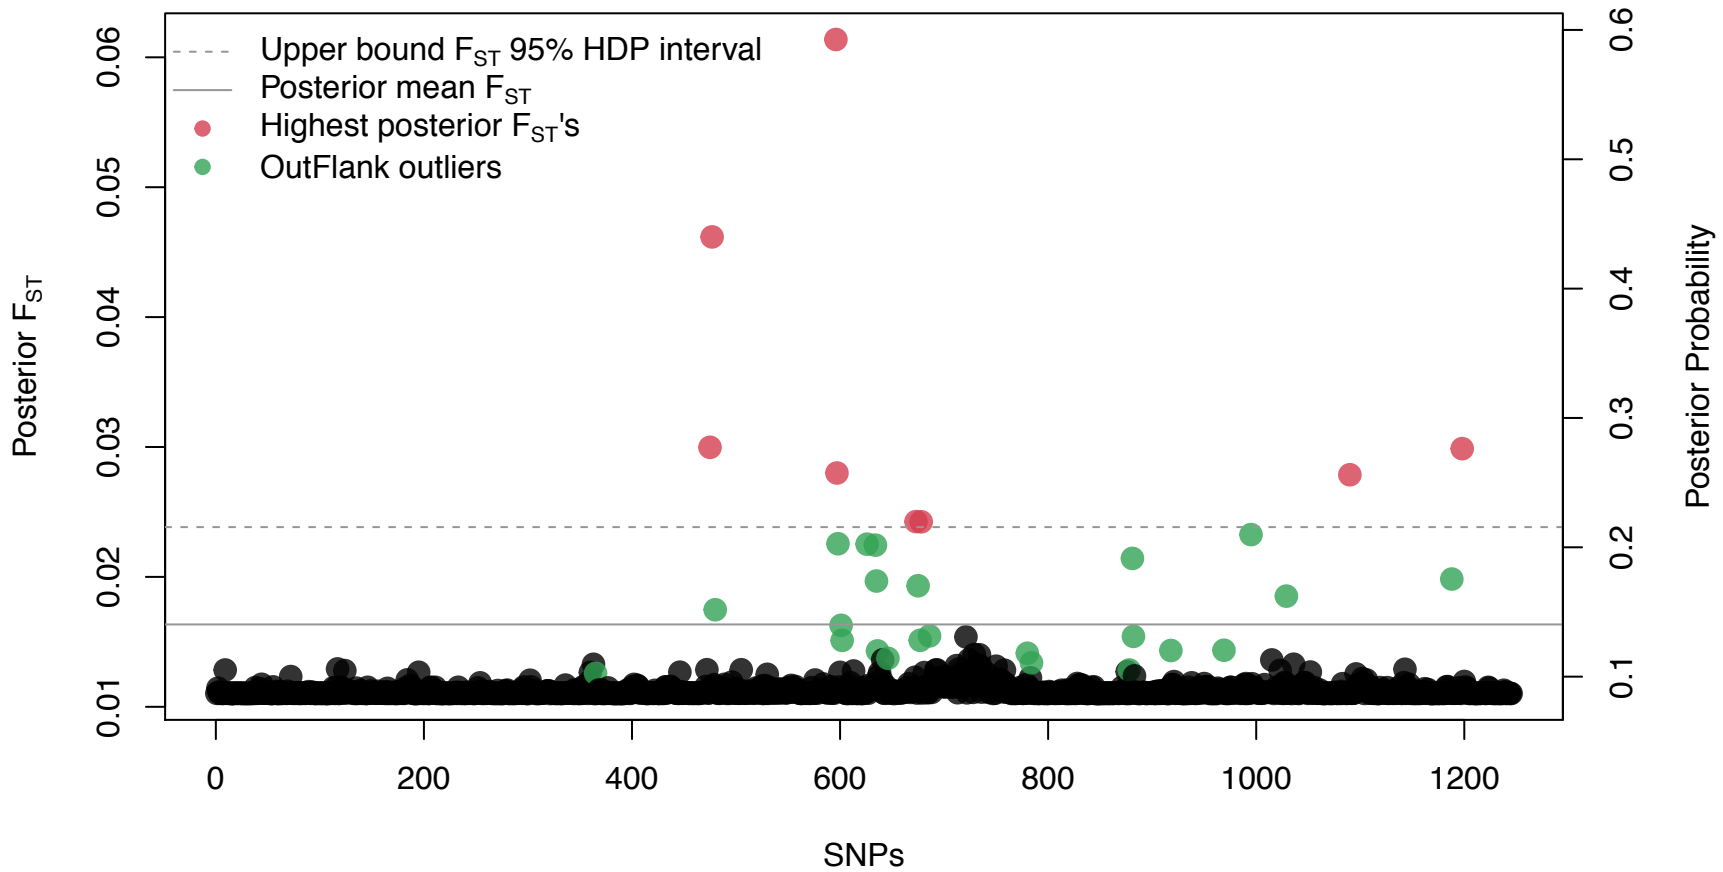

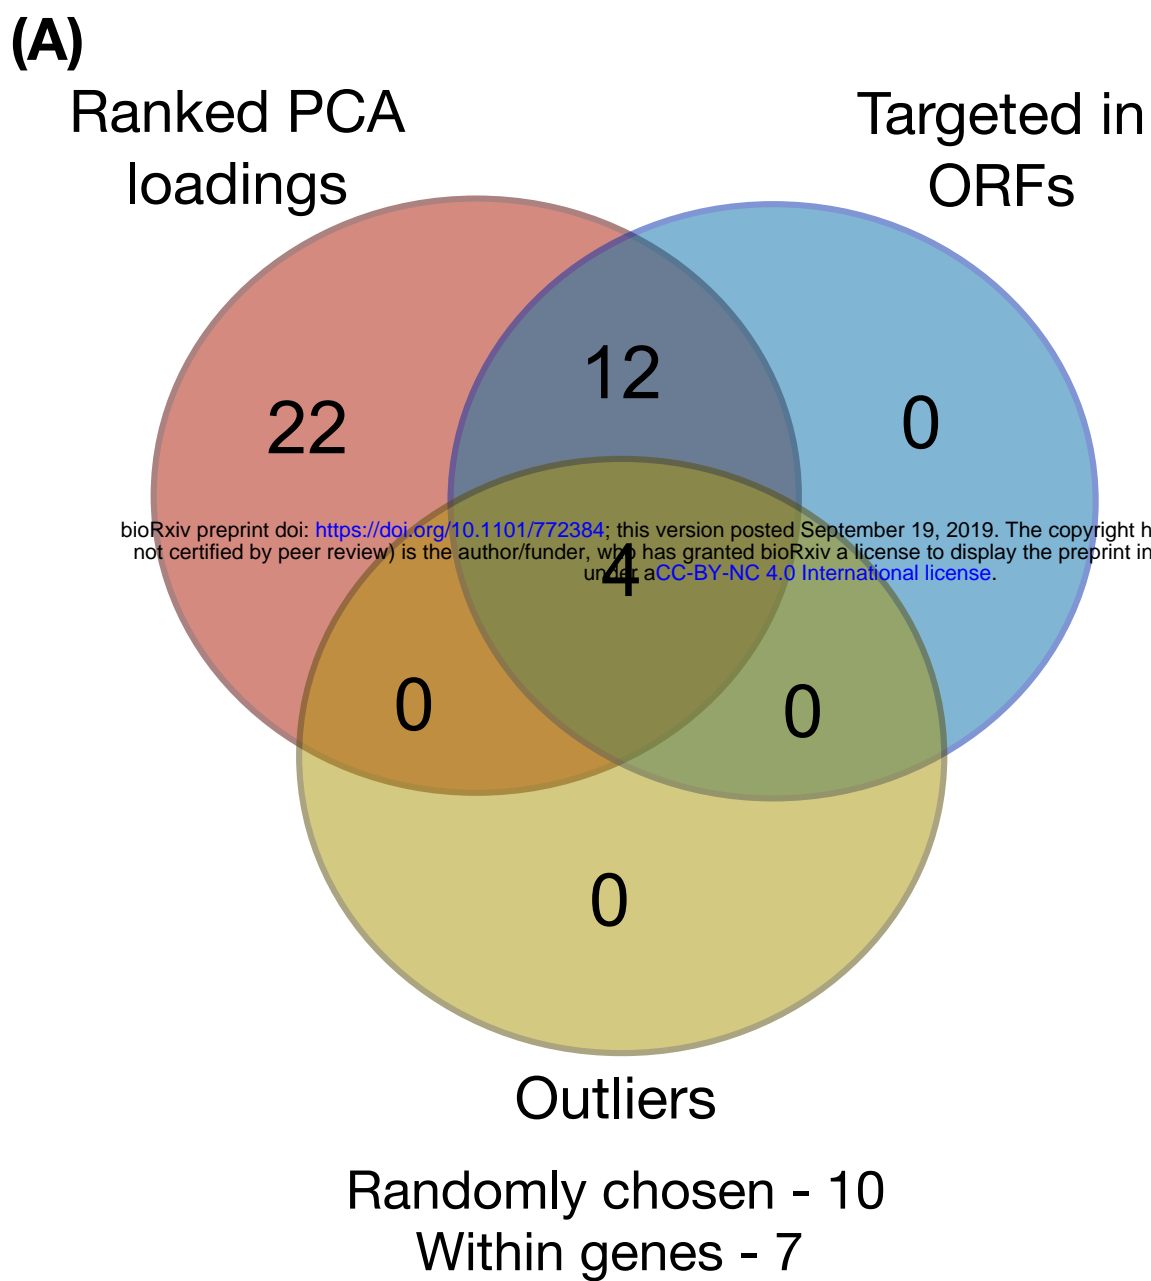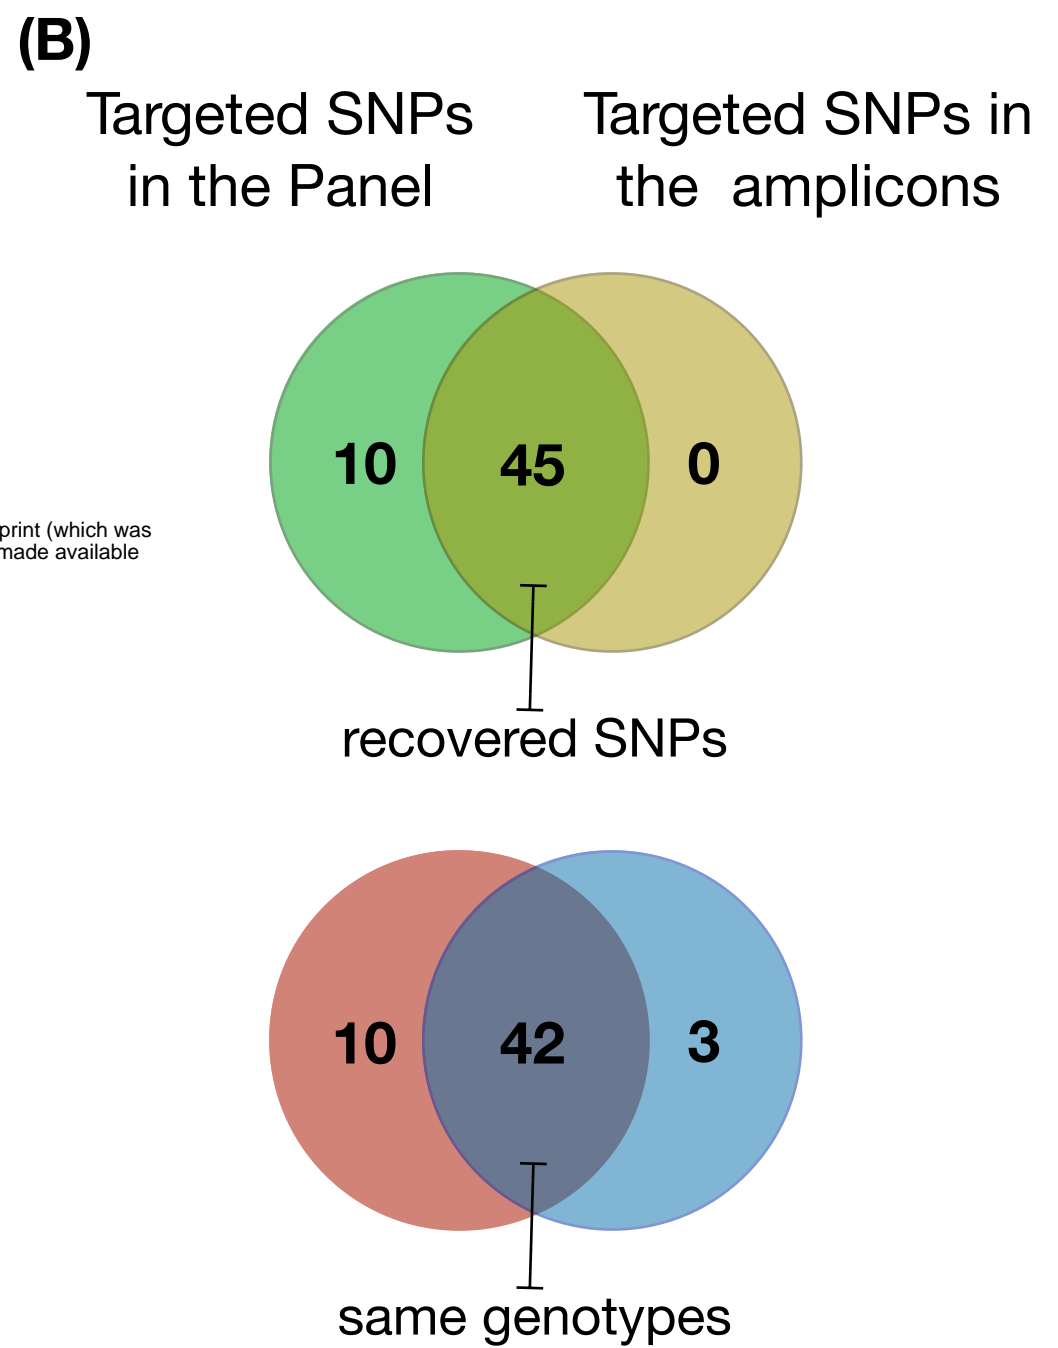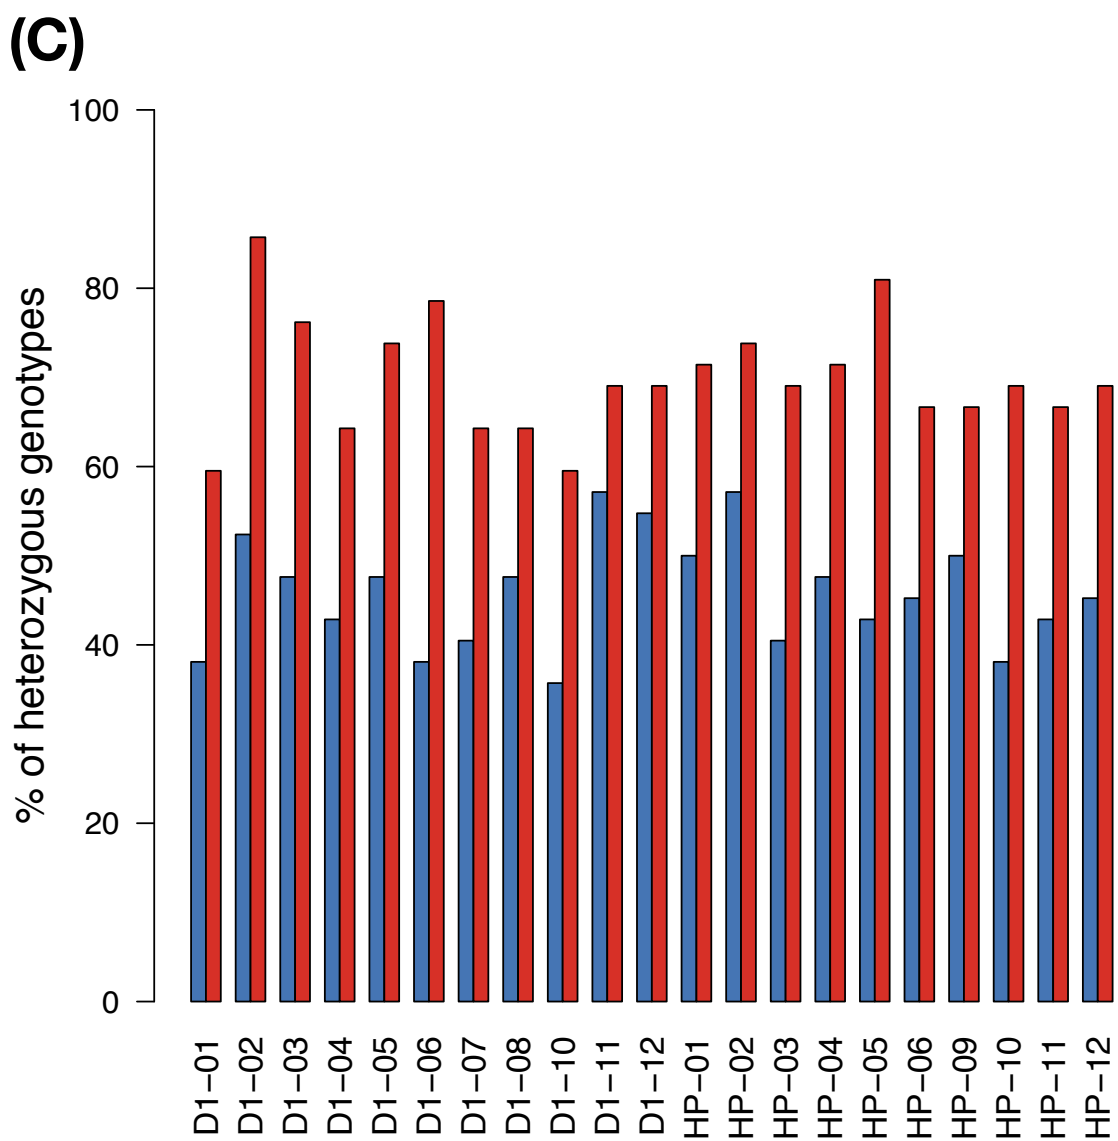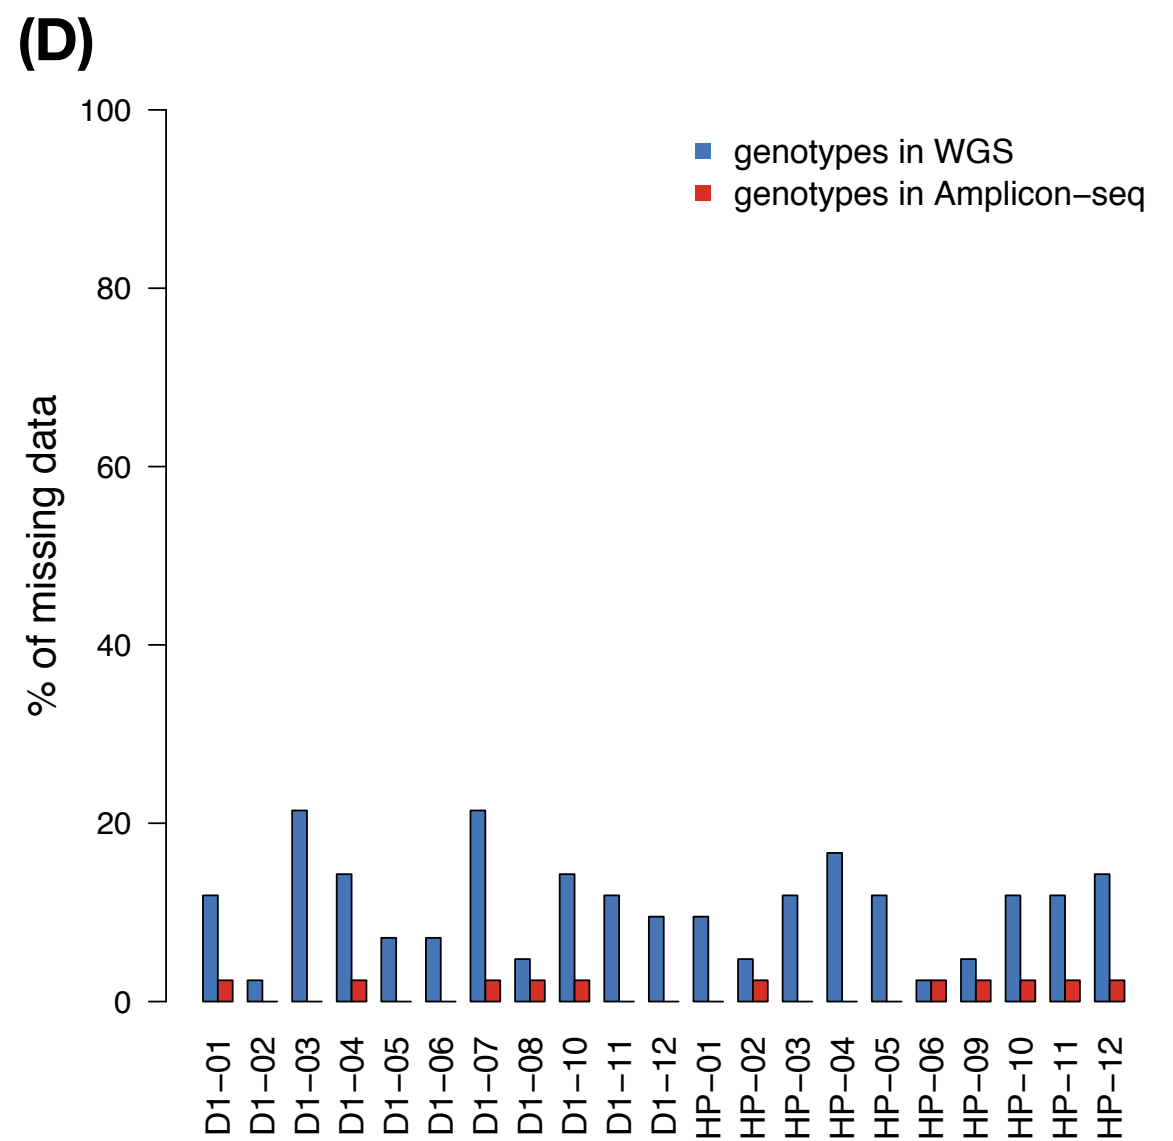



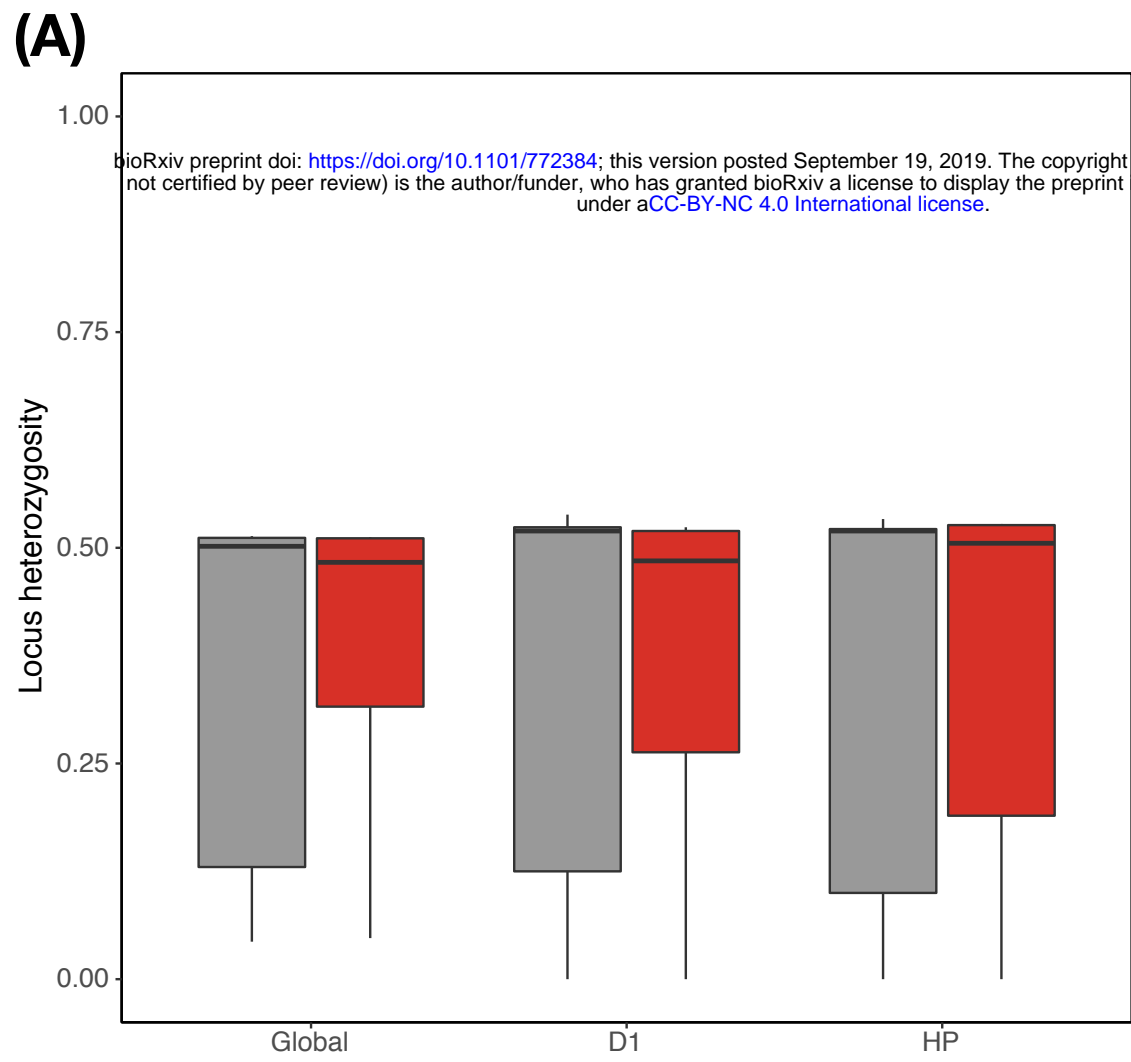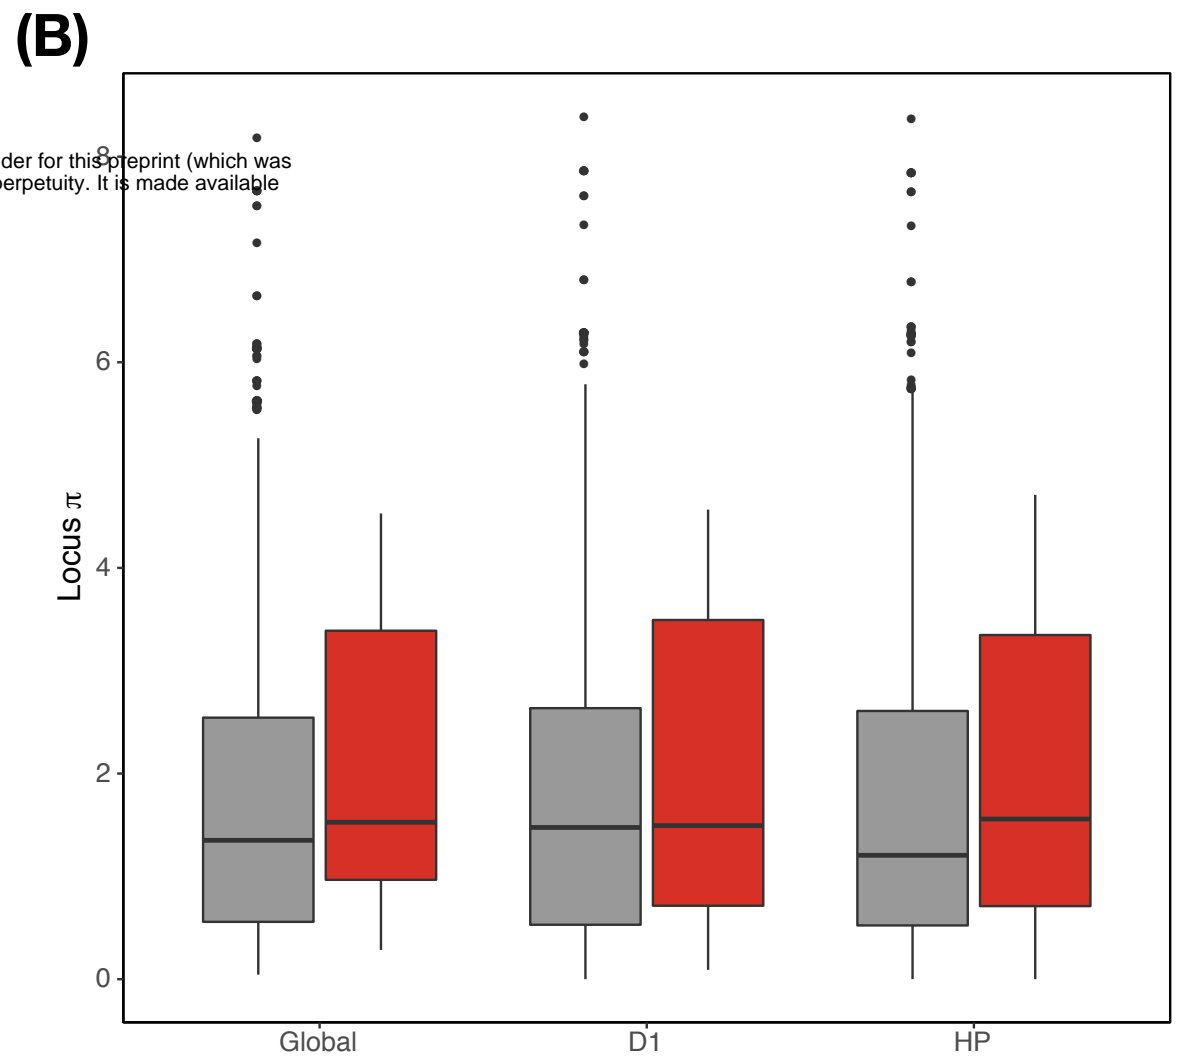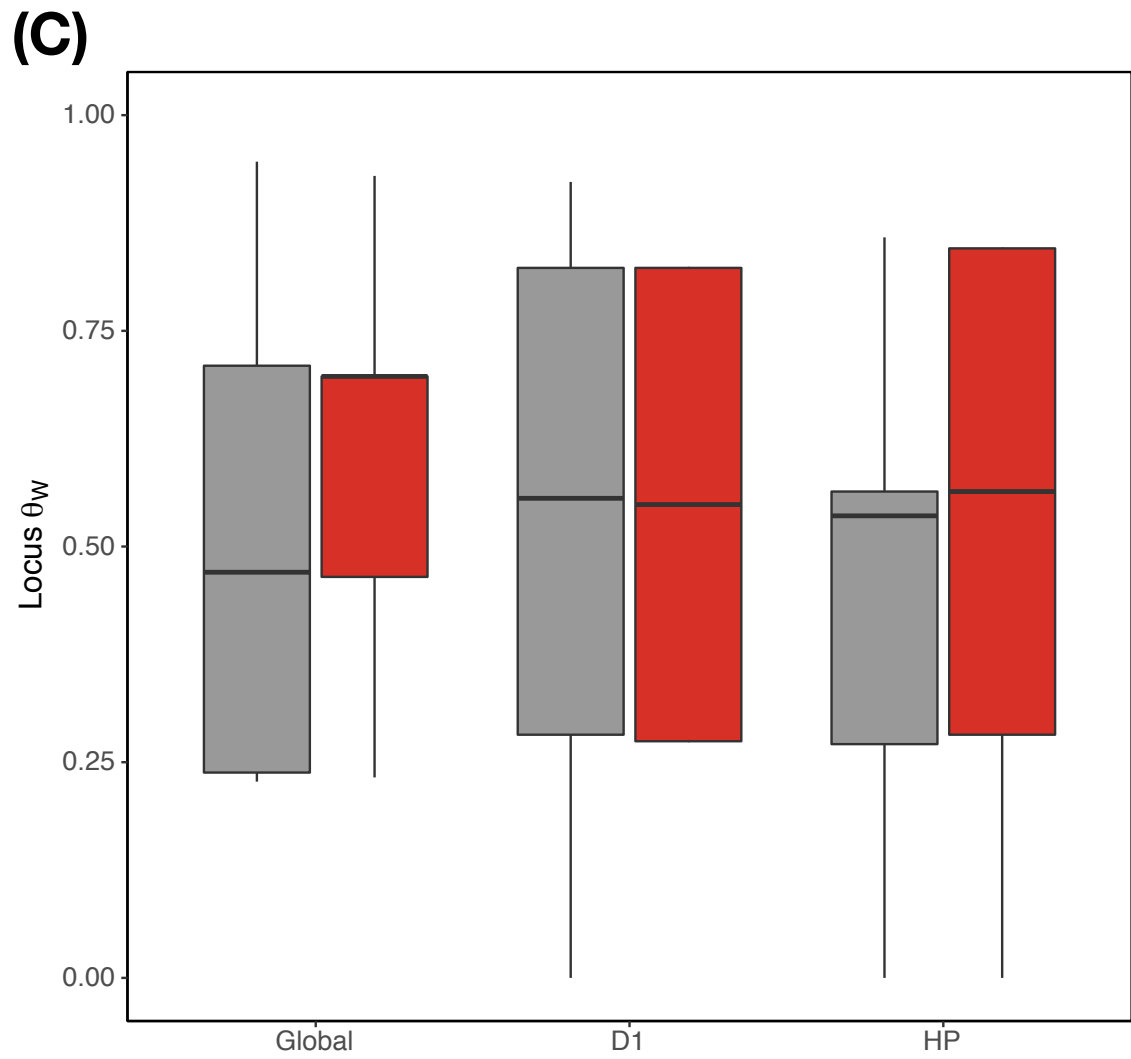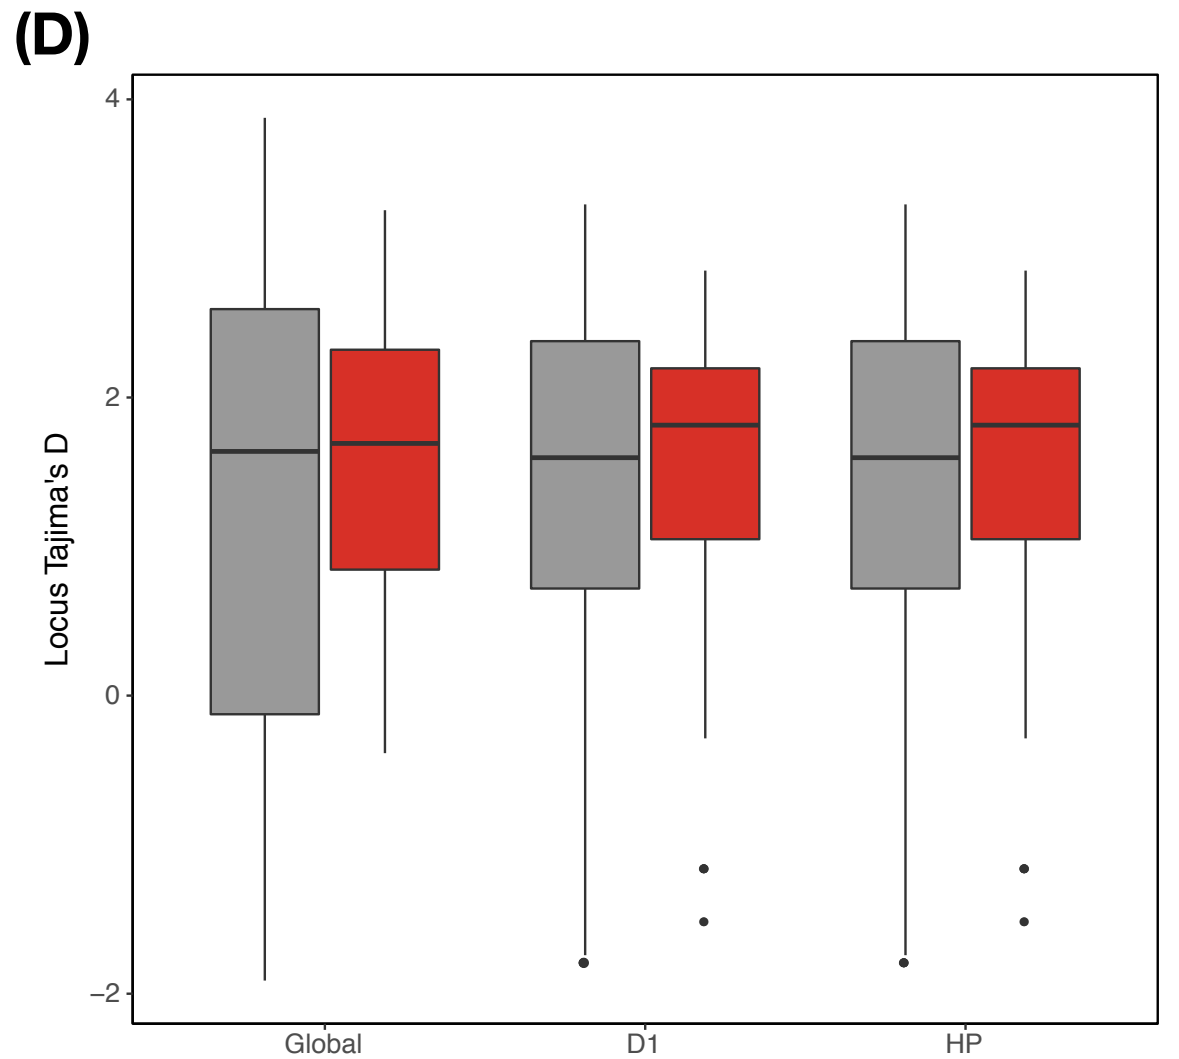

Datasets:  WGR SNPs  Amplicon-seq SNPs
